# Supplementary material for: Electrochemical synthesis of ammonia from N2 and H2O using a typical non-noble metal carbon-based catalyst under ambient conditions
Source: Royal Society of Chemistry journal article supplement (doi:10.1039/c8cy02316f), 2019-01-01
Supplement: c8cy02316f1.pdf [file c8cy02316f1.pdf]

## Electrochemical Synthesis of Ammonia from $N_2$ and $H_2O$ Using A Typical Non-noble Metal Carbon-based Catalyst under Ambient Conditions

Linchuan Cong<sup>a</sup>, Zhuochen Yu<sup>a</sup>, Fangbing Liu<sup>a</sup>, Weimin Huang<sup>\*a,b</sup>

*a* College of Chemistry, Jilin University, Changchun 130012, China

*b* Key Laboratory of Physics and Technology for Advanced Batteries of Ministry of  
Education, Jilin University, Changchun 130012, China

\*Corresponding Author

E-mail address: [huangwm@jlu.edu.cn](mailto:huangwm@jlu.edu.cn) (W. Huang).

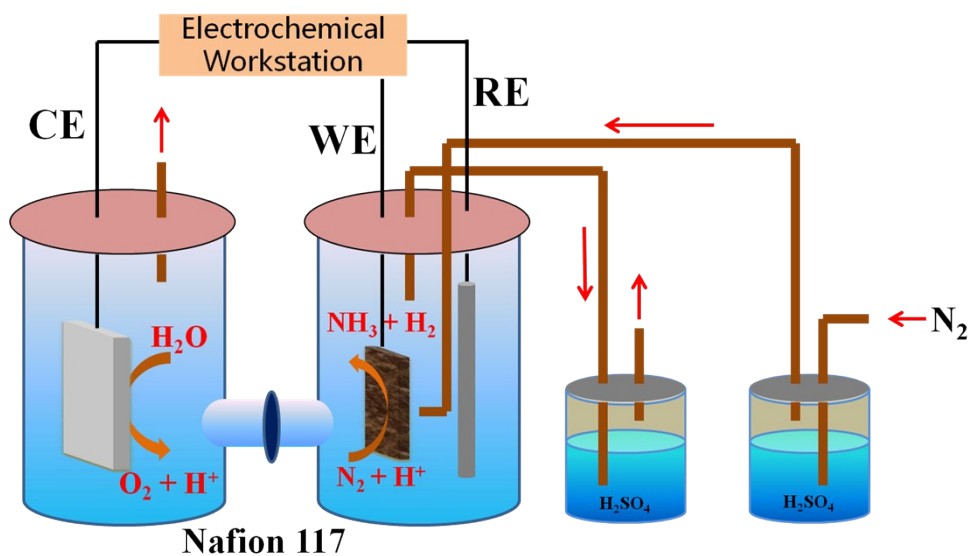

Figure.S1 The schematic diagram of the experimental device

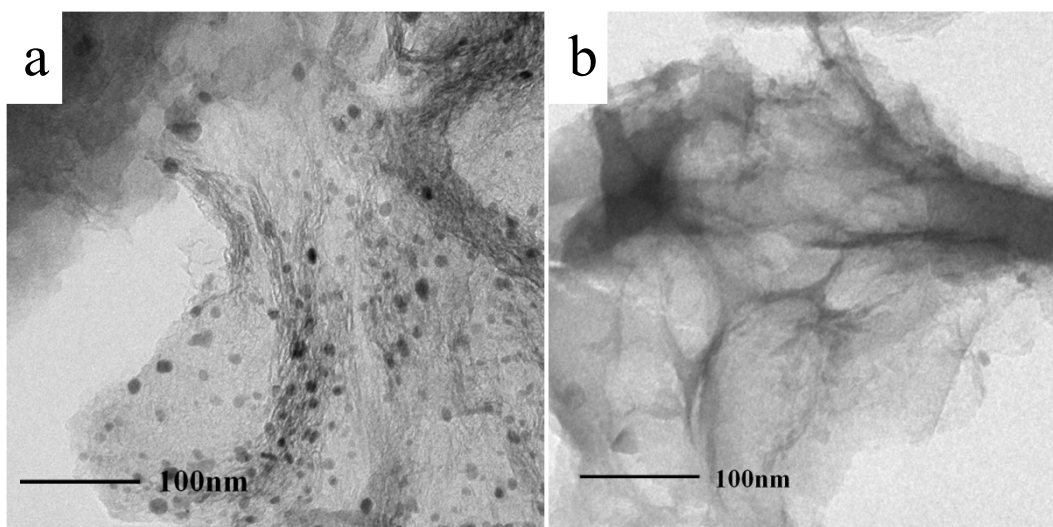

**Figure.S2** TEM of (a) the Fe-doped carbon (CF) and (b) the N-doped carbon (NC)

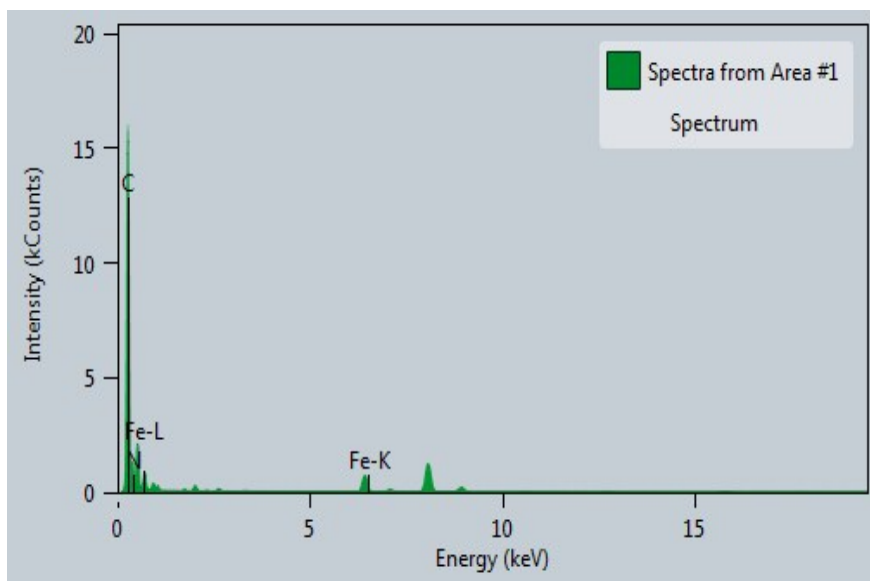

**Figure.S3** EDS spectrum for the resultant NCF.

|            |       |      |      |
|------------|-------|------|------|
| element    | C     | N    | Fe   |
| Content(%) | 87.34 | 6.17 | 6.49 |

**Table. S1** Percentage of different elements for NCF.

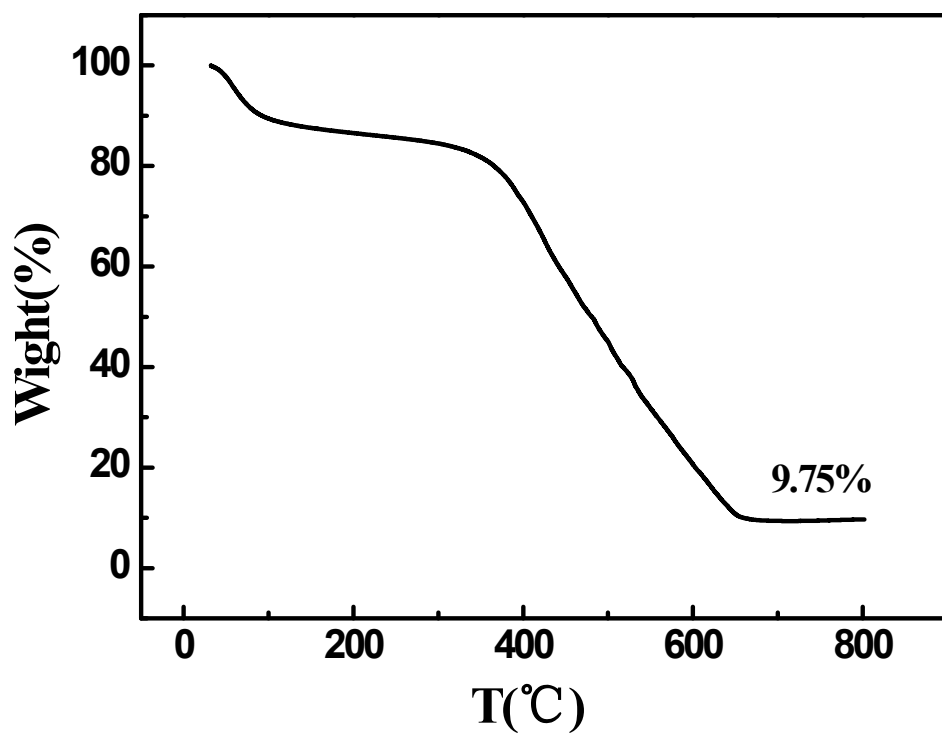

Figure. S4 TGA for the resultant NCF.

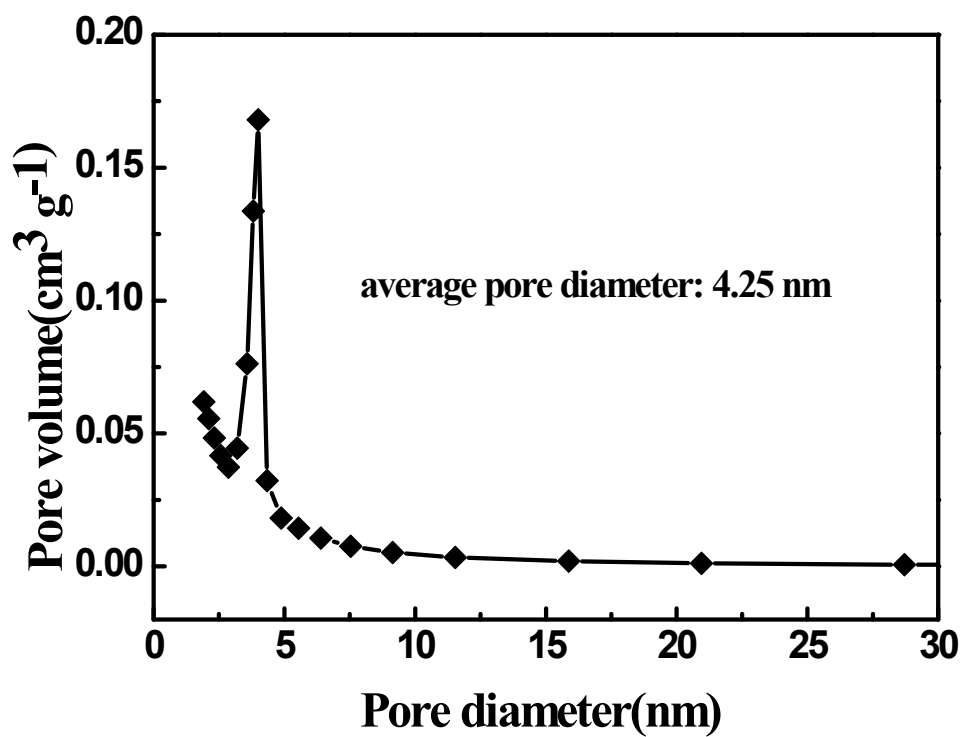

Figure.S5 BJH pore diameter distribution of NCF.

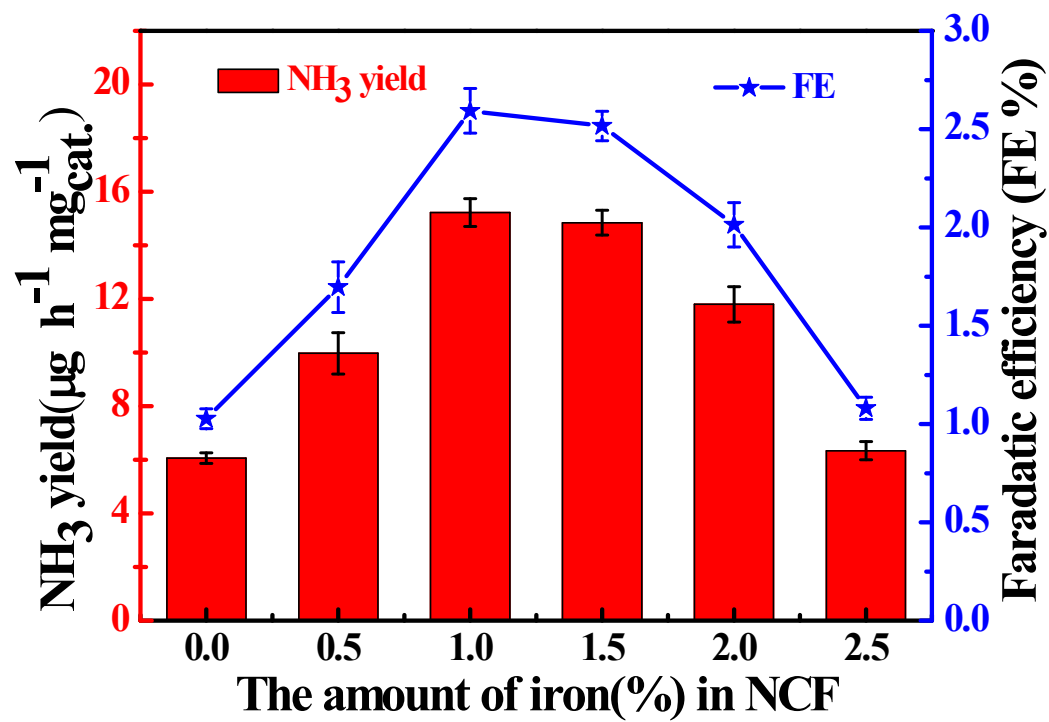

Figure. S6 Yield rate and FE of NH<sub>3</sub> with different iron content about NCF.

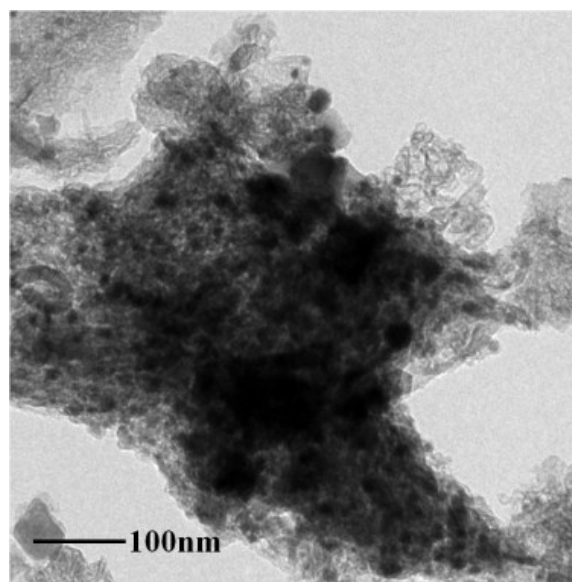

Figure. S7 TEM images of the NCF-Fe<sub>2.5</sub>.

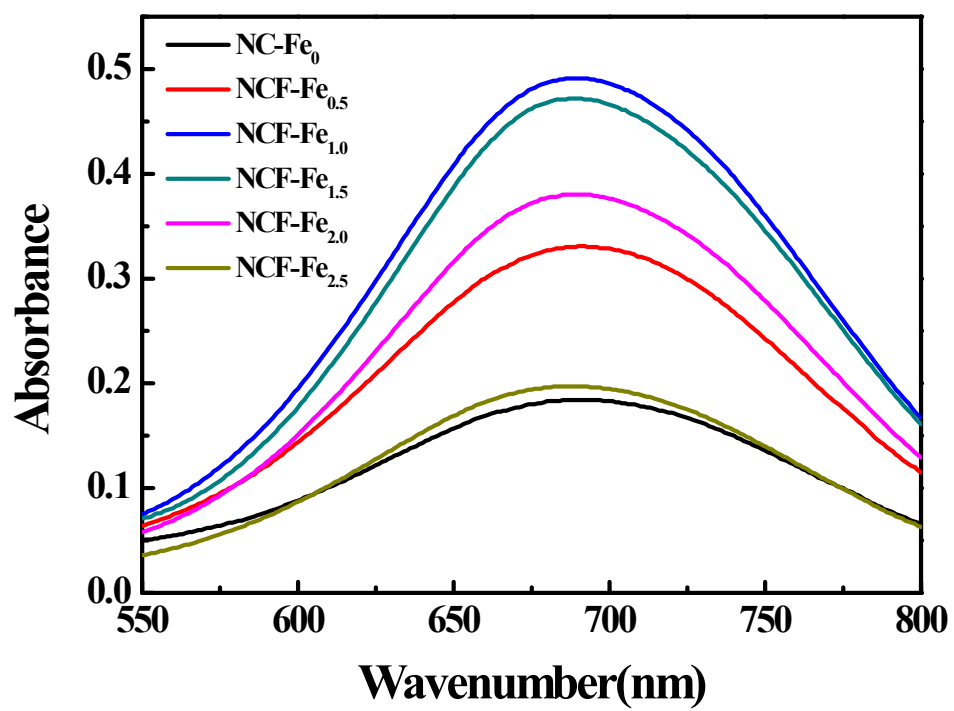

**Figure. S8** UV-Vis curves of indophenol tests under different iron content about NCF.

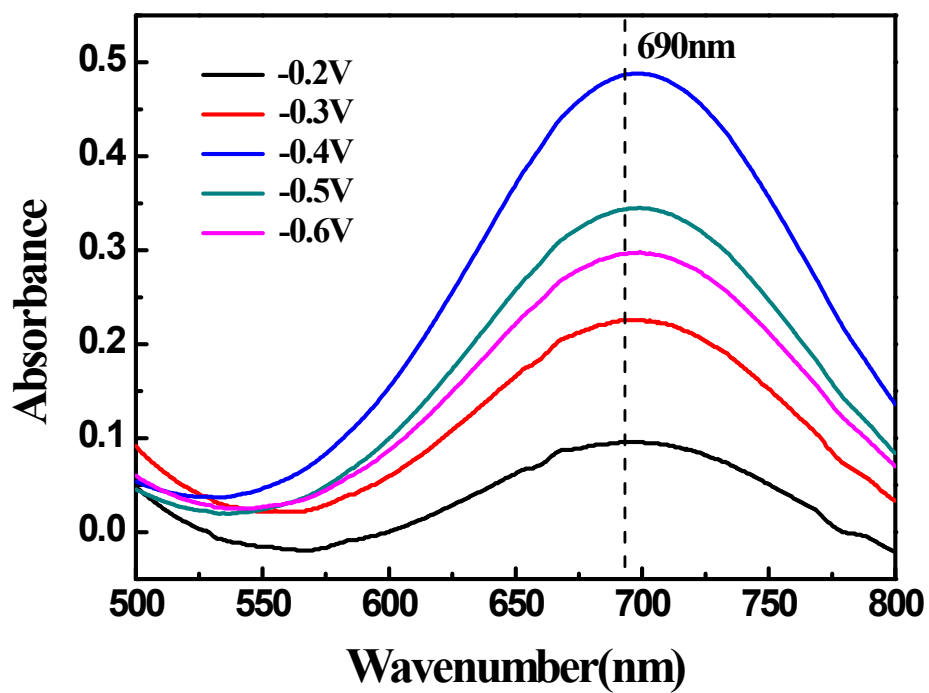

Figure.S9 UV-Vis curves of indophenol tests under different potentials.



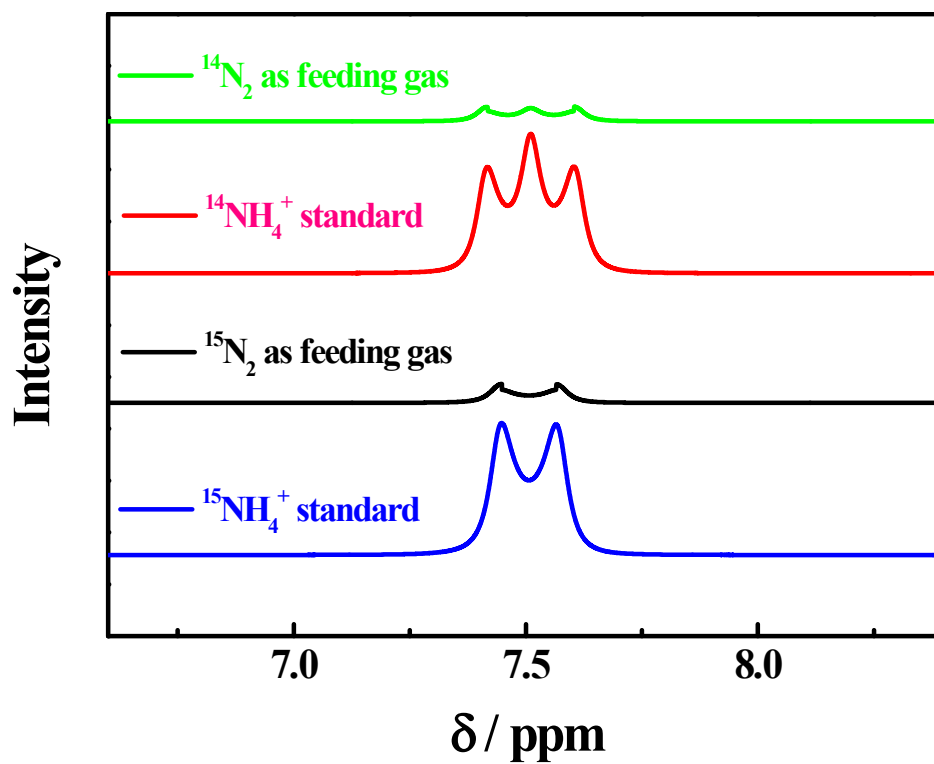

**Figure.S10**  $^1\text{H}$  NMR spectra of the  $^{15}\text{NH}_4^+$  or  $^{14}\text{NH}_4^+$  standards and the electrochemical NRR product using the NCF catalyst in the  $^{15}\text{N}_2$  and  $^{14}\text{N}_2$  atmosphere, respectively.

**Table S2.** Comparison of the NH<sub>3</sub> electrosynthesis activity for NCF with other NRR catalysts.

| System/Catalyst                                                                          | Conditions     | NH <sub>3</sub> Yield                                       | FE    | Testing Method     | Reference                                                      |
|------------------------------------------------------------------------------------------|----------------|-------------------------------------------------------------|-------|--------------------|----------------------------------------------------------------|
| NCF                                                                                      | ambient        | 15.804 μg h <sup>-1</sup> mg <sub>cat.</sub> <sup>-1</sup>  | 2.72% | Indophenol method  | This work                                                      |
| Pt/C                                                                                     | 80 °C          | 9.37×10 <sup>-6</sup> mol m <sup>-2</sup> s <sup>-1</sup>   | 0.83% | Nessler's reagent  | <i>RSC Adv.</i> <b>2013</b> , 3, 18016.                        |
| Mo nanofilm                                                                              | ambient        | 3.09×10 <sup>-11</sup> mol s <sup>-1</sup> cm <sup>-2</sup> | 0.72% | Indophenol method  | <i>J. Mater. Chem. A</i> , <b>2017</b> , 5, 18967–18971        |
| MoS <sub>2</sub> /CC                                                                     | ambient        | 8.08×10 <sup>-11</sup> mol s <sup>-1</sup> cm <sup>-2</sup> | 1.17% | Indophenol method  | <i>Adv. Mater.</i> , <b>2018</b> , 30, 1800191                 |
| MoO <sub>3</sub> nanosheet                                                               | ambient        | 29.43 μg h <sup>-1</sup> mg <sub>cat.</sub> <sup>-1</sup>   | 1.9%  | Indophenol method  | <i>J. Mater. Chem. A</i> , <b>2018</b> , 6, 12974-12977        |
| TA-reduced Au/TiO <sub>2</sub>                                                           | ambient        | 21.4 μg h <sup>-1</sup> mg <sub>cat.</sub> <sup>-1</sup>    | 8.11% | Indophenol method  | <i>Angew. Chem. Int. Ed.</i> , <b>2018</b> , 57, 6073–6076.    |
| α-Au/CeO <sub>x</sub> -RGO                                                               | ambient        | 8.31 μg h <sup>-1</sup> mg <sub>cat.</sub> <sup>-1</sup>    | 10.1% | Indophenol method  | <i>Adv. Mater.</i> <b>2017</b> , 29, 1700001.                  |
| γ-Fe <sub>2</sub> O <sub>3</sub>                                                         | ambient        | 0.212 μg h <sup>-1</sup> mg <sub>cat.</sub> <sup>-1</sup>   | 1.9%  | spectrophotometry  | <i>ACS Sustain. Chem. Eng.</i> , <b>2017</b> , 5, 10986–10995. |
| Fe <sub>2</sub> O <sub>3</sub> /CNTs                                                     | ambient        | 3.59×10 <sup>-12</sup> mol s <sup>-1</sup> cm <sup>-2</sup> | 0.15% | Indophenol method  | <i>Angew. Chem., Int. Ed.</i> , <b>2017</b> , 56, 2699–2703.   |
| N-doped nanocarbon                                                                       | ambient        | 27.2 μg h <sup>-1</sup> mg <sub>cat.</sub> <sup>-1</sup>    | 1.42% | spectrophotometry  | <i>ACS Catal.</i> , <b>2018</b> , 8, 1186–1191.                |
| Ru(7.8wt%)-Y <sub>5</sub> Si <sub>3</sub>                                                | 500 °C         | 1.9 mmol g <sup>-1</sup> h <sup>-1</sup>                    |       | Ion chromatography | <i>J. Am. Chem. Soc.</i> <b>2016</b> , 138, 3970-3973          |
| La <sub>0.8</sub> Cs <sub>0.2</sub> Fe <sub>0.8</sub> Ni <sub>0.2</sub> O <sub>3-δ</sub> | 600 °C         | 1.23×10 <sup>-10</sup> mol s <sup>-1</sup> cm <sup>-2</sup> | 0.55% | ammonia meter      | <i>Electrochim. Acta</i> , <b>2014</b> , 123, 582–587.         |
| Fe <sub>2</sub> O <sub>3</sub> (Salicylic Method)                                        | 250 °C, 25 bar | ----                                                        | 35%   | Indophenol method  | <i>Science</i> <b>2014</b> , 345, 637.                         |
